# Supplementary material
Source: PubMed Central journal article supplement (PMC3985418)
Supplement: NIHMS542780-supplement-Supplement1.pdf [file NIHMS542780-supplement-Supplement1.pdf]

## Supplementary Appendix

This appendix has been provided by the authors to give readers additional information about their work.

Supplement to: Stiff PJ, Unger JM, Cook JR, et al. Autologous transplantation as consolidation for aggressive non-Hodgkin's lymphoma. *N Engl J Med* 2013;369:1681-90. DOI: 10.1056/NEJMoa1301077

## Supplementary Appendix

Supplement to: Stiff PJ, Unger JM, Cook JR et al: Autologous Transplant as Consolidation for Aggressive non-Hodgkin's Lymphoma

### **Contents:**

Table S1: page 2

Table S2: page 3

Figure S2: page 4

Reference: page 5

Table S1. International Prognostic Index (IPI) for Aggressive non-Hodgkin's Lymphoma

Risk Factors for the definition of the age-adjusted IPI used in this study:

PS<sup>1</sup> 2-4  
Ann Arbor Stage III/IV  
LDH elevated

Risk Groups and outcome for the age-adjusted IPI:

| <u>Number of Risk Factors</u> | <u>IPI Group</u>  | <u>5 Year Survival(%)</u> |
|-------------------------------|-------------------|---------------------------|
| 1                             | Low               | 83                        |
| 2                             | low intermediate  | 69                        |
| 3                             | high intermediate | 46                        |
| 4                             | high              | 32                        |

<sup>1</sup>PS (Performance status; assessed according to the ECOG scale. PS 2: patient bedridden less than half the day; PS 3: patient bedridden half or more of the day; PS 4: chronically bedridden and required assistance with the activities of daily living)

Table S2. Characteristics of Randomized Patients

|                                        | CHOP(R) x 1+ ASCT<br>(N =125) | CHOP x 3<br>(N=128) |
|----------------------------------------|-------------------------------|---------------------|
| Age - years Median                     | 49.6                          | 51.3                |
| % ≥ 60 yrs                             | 20%                           | 18%                 |
| Sex – Male                             | 61%                           | 56%                 |
| WHO B Cell Histology                   | 88%                           | 89%                 |
| Diffuse Large B-Cell, NOS <sup>1</sup> | 69%                           | 61%                 |
| WHO T Cell Histology                   | 12%                           | 11%                 |
| Peripheral T, NOS <sup>1</sup>         | 5%                            | 3%                  |
| Immunophenotyping:                     |                               |                     |
| B cell CHOP-R                          | 60%                           | 59%                 |
| B cell CHOP                            | 28%                           | 31%                 |
| Stage                                  |                               |                     |
| Bulky II                               | 3%                            | 7%                  |
| III/IV                                 | 35%/62%                       | 2%/61%              |
| Performance Status ≥ 2                 | 38%                           | 34%                 |
| Elevated LDH                           | 85%                           | 81%                 |
| B Symptoms                             | 60%                           | 63%                 |
| International Index: High              | 35%                           | 34%                 |
| Extra nodal Sites ≥ 2                  | 25%                           | 23%                 |
| Bone marrow involvement –Yes           | 15%                           | 24%                 |

<sup>1</sup>NOS (not otherwise specified)

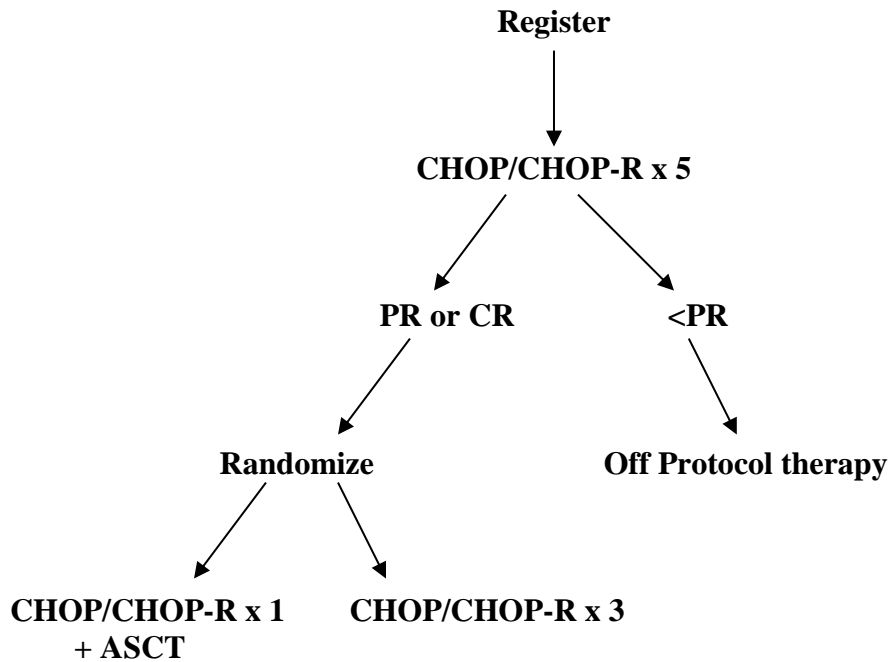

Figure S1: Schema

Patients were permitted to have 1 cycle of CHOP(R) prior to protocol registration  
 Transplant regimens: SWOG TBI (12 Gy/8 Fx) or BCNU (150 mg/m<sup>2</sup> x 3d) + VP16 (60 mg/kg) + Cyclophosphamide (100 mg/kg); ASCT (autologous stem cell transplant)

Reference:

The International Non-Hodgkin's Lymphoma Prognostic Factors Project: A predictive model for aggressive non-Hodgkin's lymphoma. N. Engl. J. Med. 1993; 329:987-994.
